# Supplementary material for: Regulation of Platelet-Derived ADAM17: A Biomarker Approach for Breast Cancer?
Source: MDPI journal article supplement (doi:10.3390/diagnostics11071188), 2021-06-30
Supplement: s1 [file s1]

**Supplementary Table S1.** Patient characteristics.

| Patient characteristics                    | Total (n=70)                  |
|--------------------------------------------|-------------------------------|
| Age                                        |                               |
| Age in years, mean–yr. $\pm$ SD<br>(range) | 60.3 $\pm$ 11.9<br>(27 to 87) |
| Gender                                     |                               |
| Female, n (%)                              | 69 (98.6)                     |
| TNM classification, n (%)                  |                               |
| Tumor size                                 |                               |
| T0                                         | 2 (2.9)                       |
| T1                                         | 23 (32.9)                     |
| T2                                         | 31 (44.3)                     |
| T3                                         | 8 (11.4)                      |
| T4                                         | 5 (7.1)                       |
| unknown                                    | 1 (1.4)                       |
| Regional Node                              |                               |
| N0                                         | 39 (55.7)                     |
| N1                                         | 18 (25.7)                     |
| N2                                         | 6 (8.6)                       |
| N3                                         | 2 (2.9)                       |
| unknown                                    | 5 (7.1)                       |
| Metastasis                                 |                               |
| M0                                         | 45 (64.3)                     |
| M1                                         | 25 (35.7)                     |
| UICC stage, n (%)                          |                               |
| 0                                          | 2 (2.9)                       |
| 1                                          | 21 (30)                       |
| 2                                          | 15 (21.4)                     |
| 3                                          | 7 (10)                        |
| 4                                          | 25 (35.7)                     |
| Localization of primary tumor, n<br>(%)    |                               |
| Right                                      | 25 (35.7)                     |
| Left                                       | 44 (62.9)                     |
| Bilateral                                  | 1 (1.4)                       |
| Histological grading, n (%)                |                               |
| G1                                         | 5 (7.1)                       |
| G2                                         | 33 (47.1)                     |
| G3                                         | 31(44.3)                      |
| unknown                                    | 1 (1.4)                       |
| Receptor status, n (%)                     |                               |
| ER-positive                                | 57(81.4)                      |
| PR-positive                                | 45(64.3)                      |
| HER2 receptor                              |                               |
| Positive                                   | 13 (18.6)                     |

UICC, Union for International Cancer Control; ER, estrogen receptor; PR, progesterone receptor; HER, human epidermal growth factor receptor
